# Supplementary material
Source: ML conference proceedings conference paper supplement (https://proceedings.mlr.press/v32/valko14.html)
Supplement: Supplementary file 1 [file valko14-supp.zip]

## Supplementary Material

### Confidence ellipsoid

**Lemma 3.** Let  $\mathbf{V}_t = \mathbf{X}_{t-1}\mathbf{X}_{t-1}^\top + \mathbf{\Lambda}$  and  $\|\boldsymbol{\alpha}^*\|_{\mathbf{\Lambda}} \leq C$ . For any  $\mathbf{x}$  and  $t \geq 1$ , with probability at least  $1 - \delta$ :

$$|\mathbf{x}^\top(\hat{\boldsymbol{\alpha}}_t - \boldsymbol{\alpha}^*)| \leq \|\mathbf{x}\|_{\mathbf{V}_t^{-1}} \left( R \sqrt{2 \log \left( \frac{|\mathbf{V}_t|^{1/2}}{\delta |\mathbf{\Lambda}|^{1/2}} \right)} + C \right)$$

*Proof of Lemma 3.* We have:

$$\begin{aligned} |\mathbf{x}^\top(\hat{\boldsymbol{\alpha}}_t - \boldsymbol{\alpha}^*)| &= |\mathbf{x}^\top(-\mathbf{V}_t^{-1}\mathbf{\Lambda}\boldsymbol{\alpha}^* + \mathbf{V}_t^{-1}\boldsymbol{\xi}_t)| \\ &\leq |\mathbf{x}^\top\mathbf{V}_t^{-1}\mathbf{\Lambda}\boldsymbol{\alpha}^*| + |\mathbf{x}^\top\mathbf{V}_t^{-1}\boldsymbol{\xi}_t| \\ &\leq \langle \mathbf{x}^\top, \mathbf{\Lambda}\boldsymbol{\alpha}^* \rangle_{\mathbf{V}_t^{-1}} + \langle \mathbf{x}, \boldsymbol{\xi}_t \rangle_{\mathbf{V}_t^{-1}} \\ &\leq \|\mathbf{x}\|_{\mathbf{V}_t^{-1}} \left( \|\boldsymbol{\xi}_t\|_{\mathbf{V}_t^{-1}} + \|\mathbf{\Lambda}\boldsymbol{\alpha}^*\|_{\mathbf{V}_t^{-1}} \right), \end{aligned}$$

where we used Cauchy-Schwarz inequality in the last step. Now we bound  $\|\boldsymbol{\xi}_t\|_{\mathbf{V}_t^{-1}}$  by Lemma 1 and notice that:

$$\begin{aligned} \|\mathbf{\Lambda}\boldsymbol{\alpha}^*\|_{\mathbf{V}_t^{-1}} &= \sqrt{(\boldsymbol{\alpha}^*)^\top \mathbf{\Lambda} \mathbf{V}_t^{-1} \mathbf{\Lambda} \boldsymbol{\alpha}^*} \\ &\leq \sqrt{(\boldsymbol{\alpha}^*)^\top \mathbf{\Lambda} \boldsymbol{\alpha}^*} = \|\boldsymbol{\alpha}^*\|_{\mathbf{\Lambda}} \leq C \end{aligned}$$

□

### Effective dimension

**Lemma 11.** For any real positive-definite matrix  $\mathbf{A}$  with only simple eigenvalue multiplicities and any vector  $\mathbf{x}$  such that  $\|\mathbf{x}\|_2 \leq 1$  we have that the determinant  $|\mathbf{A} + \mathbf{x}\mathbf{x}^\top|$  is maximized by a vector  $\mathbf{x}$  which is aligned with an eigenvector of  $\mathbf{A}$ .

*Proof of Lemma 11.* Using Sylvester's determinant theorem, we have:

$$|\mathbf{A} + \mathbf{x}\mathbf{x}^\top| = |\mathbf{A}| |\mathbf{I} + \mathbf{A}^{-1}\mathbf{x}\mathbf{x}^\top| = |\mathbf{A}| (1 + \mathbf{x}^\top \mathbf{A}^{-1} \mathbf{x})$$

From the spectral theorem, there exists an orthonormal matrix  $\mathbf{U}$ , the columns of which are the eigenvectors of  $\mathbf{A}$ ; such that  $\mathbf{A} = \mathbf{U}\mathbf{D}\mathbf{U}^\top$  with  $\mathbf{D}$  being a diagonal matrix with the positive eigenvalues of  $\mathbf{A}$  on the diagonal. Thus:

$$\begin{aligned} \max_{\|\mathbf{x}\|_2 \leq 1} \mathbf{x}^\top \mathbf{A}^{-1} \mathbf{x} &= \max_{\|\mathbf{x}\|_2 \leq 1} \mathbf{x}^\top \mathbf{U} \mathbf{D}^{-1} \mathbf{U}^\top \mathbf{x} \\ &= \max_{\|\mathbf{y}\|_2 \leq 1} \mathbf{y}^\top \mathbf{D}^{-1} \mathbf{y}, \end{aligned}$$

since  $\mathbf{U}$  is a bijection from  $\{\mathbf{x}, \|\mathbf{x}\|_2 \leq 1\}$  to itself.

Since there are no multiplicities, it is easy to see that the quadratic mapping  $\mathbf{y} \mapsto \mathbf{y}^\top \mathbf{D}^{-1} \mathbf{y}$  is maximized (under the constraint  $\|\mathbf{y}\|_2 \leq 1$ ) by a canonical vector  $\mathbf{e}_I$  corresponding to the lowest diagonal entry  $I$  of  $\mathbf{D}$ . Thus the maximum of  $\mathbf{x} \mapsto \mathbf{x}^\top \mathbf{A}^{-1} \mathbf{x}$  is reached for  $\mathbf{U}\mathbf{e}_I$ , which is the eigenvector of  $\mathbf{A}$  corresponding to its lowest eigenvalue. □

**Lemma 4.** Let  $\mathbf{\Lambda} = \text{diag}(\lambda_1, \dots, \lambda_N)$  be any diagonal matrix with strictly positive entries. Then for any vectors  $(\mathbf{x}_t)_{1 \leq t \leq T}$ , such that  $\|\mathbf{x}_t\|_2 \leq 1$  for all  $1 \leq t \leq T$ , we have that the determinant  $|\mathbf{V}_T|$  of  $\mathbf{V}_T = \mathbf{\Lambda} + \sum_{t=1}^T \mathbf{x}_t \mathbf{x}_t^\top$  is maximized when all  $\mathbf{x}_t$  are aligned with the axes.

*Proof of Lemma 4.* Let us write  $d(\mathbf{x}_1, \dots, \mathbf{x}_T) = |\mathbf{V}_T|$  the determinant of  $\mathbf{V}_T$ . We want to characterize:

$$\max_{\mathbf{x}_1, \dots, \mathbf{x}_T: \|\mathbf{x}_t\|_2 \leq 1, \forall 1 \leq t \leq T} d(\mathbf{x}_1, \dots, \mathbf{x}_T)$$

For any  $1 \leq t \leq T$ , let us define:

$$\mathbf{V}_{-t} = \mathbf{\Lambda} + \sum_{\substack{s=1 \\ s \neq t}}^T \mathbf{x}_s \mathbf{x}_s^\top$$

We have that  $\mathbf{V}_T = \mathbf{V}_{-t} + \mathbf{x}_t \mathbf{x}_t^\top$ . Consider the case with only simple eigenvalue multiplicities. In this case, Lemma 11 implies that  $\mathbf{x}_t \mapsto d(\mathbf{x}_1, \dots, \mathbf{x}_t, \dots, \mathbf{x}_T)$  is maximized when  $\mathbf{x}_t$  is aligned with an eigenvector of  $\mathbf{V}_{-t}$ . Thus all  $\mathbf{x}_t$ , for  $1 \leq t \leq T$ , are aligned with an eigenvector of  $\mathbf{V}_{-t}$  and therefore also with an eigenvector of  $\mathbf{V}_T$ . Consequently, the eigenvectors of  $\sum_{t=1}^T \mathbf{x}_t \mathbf{x}_t^\top$  are also aligned with  $\mathbf{V}_T$ . Since  $\mathbf{\Lambda} = \mathbf{V}_T - \sum_{t=1}^T \mathbf{x}_t \mathbf{x}_t^\top$  and  $\mathbf{\Lambda}$  is diagonal, we conclude that  $\mathbf{V}_T$  is diagonal and all  $\mathbf{x}_t$  are aligned with the canonical axes.

Now in the case of eigenvalue multiplicities, the maximum of  $|\mathbf{V}_T|$  may be reached by several sets of vectors  $\{(\mathbf{x}_t^m)_{1 \leq t \leq T}\}_m$  but for some  $m^*$ , the set  $(\mathbf{x}_t^{m^*})_{1 \leq t \leq T}$  will be aligned with the axes. In order to see that, consider a perturbed matrix  $\mathbf{V}_{-t}^\varepsilon$  by a random perturbation of amplitude at most  $\varepsilon$ , i.e. such that  $\mathbf{V}_{-t}^\varepsilon \rightarrow \mathbf{V}_{-t}$  when  $\varepsilon \rightarrow 0$ . Since the perturbation is random, then the probability that  $\mathbf{\Lambda}^\varepsilon$ , as well as all other  $\mathbf{V}_{-t}^\varepsilon$  possess an eigenvalue of multiplicity bigger than 1 is zero. Since the mapping  $\varepsilon \mapsto \mathbf{V}_{-t}^\varepsilon$  is continuous, we deduce that any adherent point  $\bar{\mathbf{x}}_t$  of the sequence  $(\mathbf{x}_t^\varepsilon)_\varepsilon$  (there exists at least one since the sequence is bounded in  $\ell_2$ -norm) is aligned with the limit  $\mathbf{V}_{-t}$  and we can apply the previous reasoning. □

**Lemma 5.** For any  $T$ , let  $\mathbf{V}_T = \sum_{t=1}^T \mathbf{x}_t \mathbf{x}_t^\top + \mathbf{\Lambda}$ . Then:

$$\log \frac{|\mathbf{V}_T|}{|\mathbf{\Lambda}|} \leq \max \sum_{i=1}^N \log \left( 1 + \frac{t_i}{\lambda_i} \right),$$

where the maximum is taken over all possible positive real numbers  $\{t_1, \dots, t_N\}$ , such that  $\sum_{i=1}^N t_i = T$ .

*Proof of Lemma 5.* We want to bound the determinant  $|\mathbf{V}_T|$  under the coordinate constraints  $\|\mathbf{x}_t\|_2 \leq 1$ . Let:

$$M(\mathbf{x}_1, \dots, \mathbf{x}_T) = \left| \mathbf{\Lambda} + \sum_{t=1}^T \mathbf{x}_t \mathbf{x}_t^\top \right|$$

From Lemma 4 we deduce that the maximum of  $M$  is reached when all  $\mathbf{x}_t$  are aligned with the axes:

$$\begin{aligned} M &= \max_{\mathbf{x}_1, \dots, \mathbf{x}_T; \mathbf{x}_t \in \{\mathbf{e}_1, \dots, \mathbf{e}_N\}} \left| \mathbf{\Lambda} + \sum_{t=1}^T \mathbf{x}_t \mathbf{x}_t^\top \right| \\ &= \max_{t_1, \dots, t_N \text{ positive integers}, \sum_{i=1}^N t_i = T} \left| \text{diag}(\lambda_i + t_i) \right| \\ &\leq \max_{t_1, \dots, t_N \text{ positive reals}, \sum_{i=1}^N t_i = T} \prod_{i=1}^N (\lambda_i + t_i), \end{aligned}$$

from which we obtain the result.  $\square$

**Lemma 6.** Let  $d$  be the effective dimension. Then:

$$\log \frac{|\mathbf{V}_T|}{|\mathbf{\Lambda}|} \leq 2d \log \left( 1 + \frac{T}{\lambda} \right)$$

*Proof of Lemma 6.* Using Lemma 5 and Definition 1:

$$\begin{aligned} \log \frac{|\mathbf{V}_T|}{|\mathbf{\Lambda}|} &\leq \sum_{i=1}^d \log \left( 1 + \frac{T}{\lambda} \right) + \sum_{i=d+1}^N \log \left( 1 + \frac{t_i}{\lambda_d} \right) \\ &\leq d \log \left( 1 + \frac{T}{\lambda} \right) + \sum_{i=1}^N \frac{t_i}{\lambda_{d+1}} \\ &\leq d \log \left( 1 + \frac{T}{\lambda} \right) + \frac{T}{\lambda_{d+1}} \\ &\leq 2d \log \left( 1 + \frac{T}{\lambda} \right) \end{aligned}$$

## SPECTRALELIMINATOR

**Lemma 7.** For any fixed  $\mathbf{x} \in \mathbb{R}^N$  and any  $\delta > 0$ , we have that if  $\beta(\boldsymbol{\alpha}^*, \delta) = 2R\sqrt{14 \log(2/\delta)} + \|\boldsymbol{\alpha}^*\|_{\mathbf{\Lambda}}$ , then at time  $t_j$  (beginning of phase  $j$ ):

$$\mathbb{P}(|\mathbf{x}^\top(\hat{\boldsymbol{\alpha}}_j - \boldsymbol{\alpha}^*)| \leq \|\mathbf{x}\|_{\mathbf{V}_j^{-1}} \beta(\boldsymbol{\alpha}^*, \delta)) \geq 1 - \delta$$

*Proof of Lemma 7.* Defining  $\boldsymbol{\xi}_j = \sum_{s=t_{j-1}+1}^{t_j} \mathbf{x}_s \varepsilon_s$ , we have:

$$\begin{aligned} |\mathbf{x}^\top(\hat{\boldsymbol{\alpha}}_j - \boldsymbol{\alpha}^*)| &= |\mathbf{x}^\top(-\mathbf{V}_j^{-1} \mathbf{\Lambda} \boldsymbol{\alpha}^* + \mathbf{V}_j^{-1} \boldsymbol{\xi}_j)| \\ &\leq |\mathbf{x}^\top \mathbf{V}_j^{-1} \mathbf{\Lambda} \boldsymbol{\alpha}^*| + |\mathbf{x}^\top \mathbf{V}_j^{-1} \boldsymbol{\xi}_j| \end{aligned} \quad (4)$$

The first term in the right hand side of (4) is bounded as:

$$\begin{aligned} |\mathbf{x}^\top \mathbf{V}_j^{-1} \mathbf{\Lambda} \boldsymbol{\alpha}^*| &\leq \|\mathbf{x}^T \mathbf{V}_j^{-1} \mathbf{\Lambda}^{1/2}\| \|\mathbf{\Lambda}^{1/2} \boldsymbol{\alpha}^*\| \\ &= \|\boldsymbol{\alpha}^*\|_{\mathbf{\Lambda}} \sqrt{\mathbf{x}^\top \mathbf{V}_j^{-1} \mathbf{\Lambda} \mathbf{V}_j^{-1} \mathbf{x}} \\ &\leq \|\boldsymbol{\alpha}^*\|_{\mathbf{\Lambda}} \sqrt{\mathbf{x}^\top \mathbf{V}_j^{-1} \mathbf{x}} = \|\boldsymbol{\alpha}^*\|_{\mathbf{\Lambda}} \|\mathbf{x}\|_{\mathbf{V}_j^{-1}} \end{aligned}$$

Now consider the second term in the r.h.s. of (4). We have:

$$|\mathbf{x}^\top \mathbf{V}_j^{-1} \boldsymbol{\xi}_j| = \left| \sum_{s=t_{j-1}+1}^{t_j} (\mathbf{x}^\top \mathbf{V}_j^{-1} \mathbf{x}_s) \varepsilon_s \right|$$

Let us notice that the points  $(\mathbf{x}_s)$  selected by the algorithm during phase  $j-1$  only depend on their width  $\|\mathbf{x}\|_{\mathbf{V}_j^{-1}}$  which does not depend on the rewards received during the phase  $j-1$ . Thus, given  $\mathcal{F}_{j-2}$ , the sequence  $(\mathbf{x}_s)_{t_{j-1}+1 \leq s < t_j}$  is deterministic. Consequently, one may use a variant of Azuma's inequality (Shamir, 2011):

$$\begin{aligned} \mathbb{P} \left( |\mathbf{x}^\top \mathbf{V}_j^{-1} \boldsymbol{\xi}_j|^2 \leq 28R^2 2 \log(2/\delta) \times \right. \\ \left. \times \mathbf{x}^\top \mathbf{V}_j^{-1} \left( \sum_{s=t_{j-1}+1}^{t_j} \mathbf{x}_s \mathbf{x}_s^\top \right) \mathbf{V}_j^{-1} \mathbf{x} \middle| \mathcal{F}_{j-2} \right) \geq 1 - \delta, \end{aligned}$$

from which we deduce:

$$\mathbb{P} \left( |\mathbf{x}^\top \mathbf{V}_j^{-1} \boldsymbol{\xi}_j|^2 \leq 56R^2 \mathbf{x}^\top \mathbf{V}_j^{-1} \mathbf{x} \log(2/\delta) \middle| \mathcal{F}_{j-2} \right) \geq 1 - \delta,$$

since  $\sum_{s=t_{j-1}+1}^{t_j} \mathbf{x}_s \mathbf{x}_s^\top \prec \mathbf{V}_j$ . Thus:

$$\mathbb{P} \left( |\mathbf{x}^\top \mathbf{V}_j^{-1} \boldsymbol{\xi}_j| \leq 2R \|\mathbf{x}\|_{\mathbf{V}_j^{-1}} \sqrt{14 \log(2/\delta)} \right) \geq 1 - \delta$$

**Lemma 8.** For all  $\mathbf{x} \in A_j$ , we have:  $\square$

$$\|\mathbf{x}\|_{\mathbf{V}_j^{-1}}^2 \leq \frac{1}{t_j - t_{j-1}} \sum_{s=t_{j-1}+1}^{t_j} \|\mathbf{x}_s\|_{\mathbf{V}_{s-1}^{-1}}^2$$

*Proof of Lemma 8.* We have:

$$\begin{aligned} (t_j - t_{j-1}) \|\mathbf{x}\|_{\mathbf{V}_j^{-1}}^2 &\leq \max_{\mathbf{x} \in A_j} \sum_{s=t_{j-1}+1}^{t_j} \|\mathbf{x}\|_{\mathbf{V}_{s-1}^{-1}}^2 \\ &\leq \sum_{s=t_{j-1}+1}^{t_j} \max_{\mathbf{x} \in A_j} \|\mathbf{x}\|_{\mathbf{V}_{s-1}^{-1}}^2 \\ &\leq \sum_{s=t_{j-1}+1}^{t_j} \max_{\mathbf{x} \in A_{j-1}} \|\mathbf{x}\|_{\mathbf{V}_{s-1}^{-1}}^2 \\ &= \sum_{s=t_{j-1}+1}^{t_j} \|\mathbf{x}_s\|_{\mathbf{V}_{s-1}^{-1}}^2, \end{aligned}$$

since the algorithm selects (during phase  $j-1$ ) the arms with largest width.  $\square$

**Lemma 9.** For each phase  $j$ , we have:

$$\sum_{s=t_{j-1}+1}^{t_j} \min \left( 1, \|\mathbf{x}_s\|_{\mathbf{V}_{s-1}^{-1}}^2 \right) \leq \log \frac{|\mathbf{V}_j|}{|\mathbf{\Lambda}|}.$$

*Proof of Lemma 9.* This lemma is proved by instantiating Lemma 2 for each phase.  $\square$
